# Supplementary material for: Does Response on the PHQ-9 Depression Questionnaire Predict Subsequent Suicide Attempt or Suicide Death?
Source: Atypon-hosted journal article supplement (doi:10.1176/appi.ps.201200587), 2013-09-16

## DO PHQ DEPRESSION QUESTIONNAIRES COMPLETED DURING OUTPATIENT VISITS PREDICT SUBSEQUENT SUICIDE ATTEMPT OR SUICIDE DEATH?

### APPENDIX

The graphs below display cumulative prevalence of any (fatal or nonfatal) suicide attempt according to response to PHQ item 9 (analogous to Figure 1 of the manuscript) for subgroups defined by:

- Sex
- Age
- Type of visit where PHQ was completed (Specialty mental health or primary care)
- Current or recent (past 30 days) use of antidepressant (yes/no)
- Year in which PHQ was completed

These stratified analyses demonstrate that the primary findings regarding the association between response to PHQ item 8 and probability of subsequent suicide attempt are consistent across all of these subgroups.

# CUMULATIVE PROBABILITY OF SUICIDE ATTEMPT ACCORDING TO RESPONSE TO PHQ ITEM 9 – STRATIFIED BY SEX

## One Minus Survival Function

Sex2 = Female

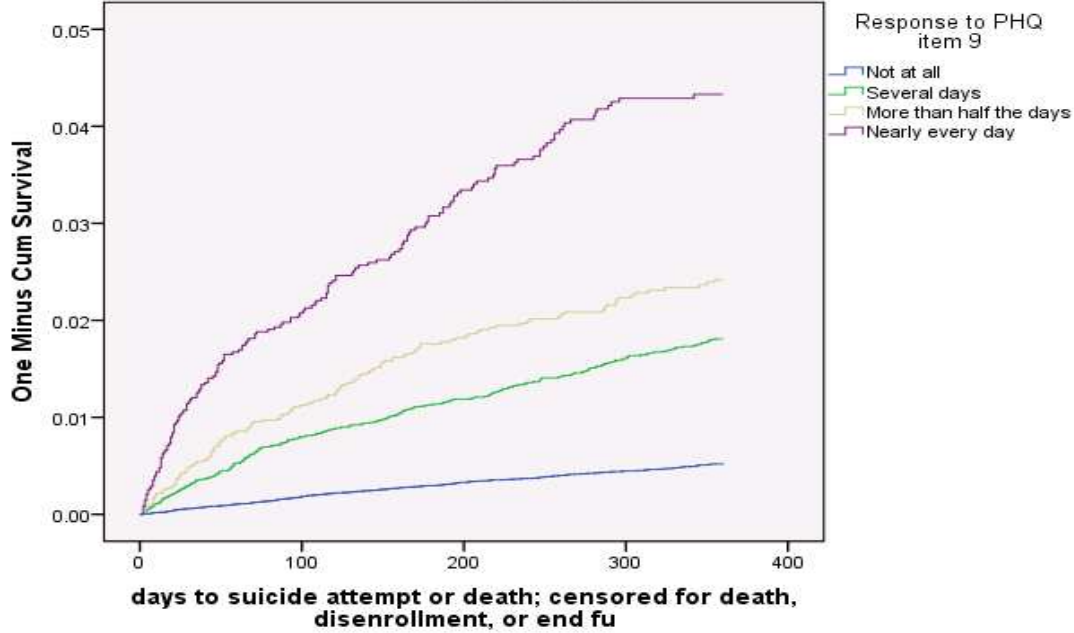

## One Minus Survival Function

Sex2 = Male

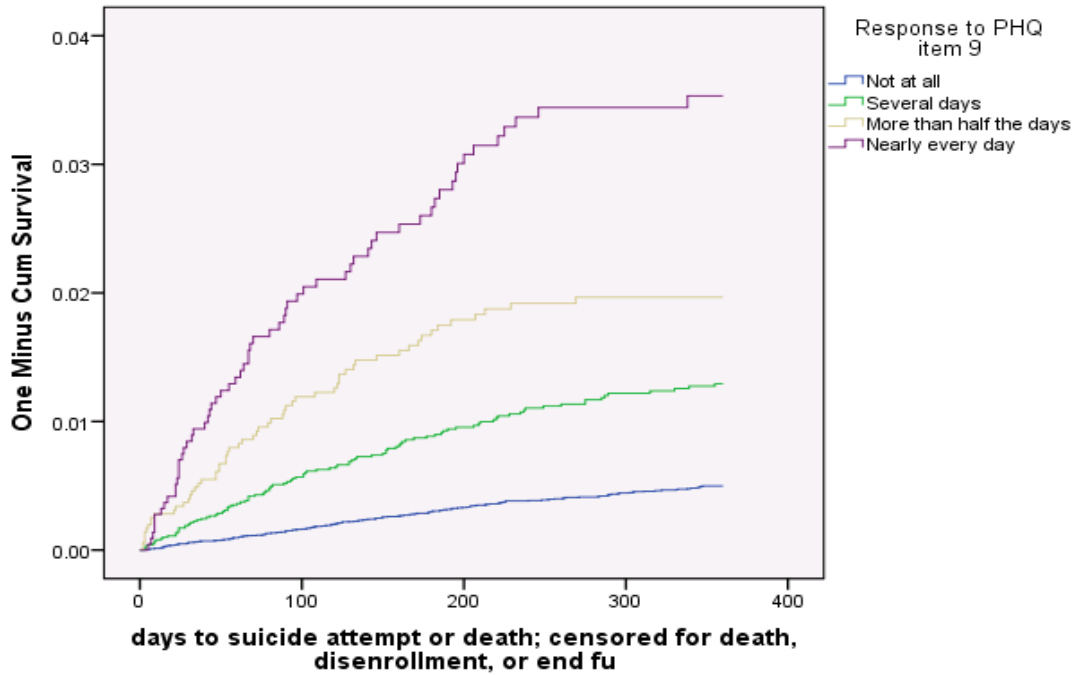

# CUMULATIVE PROBABILITY OF SUICIDE ATTEMPT ACCORDING TO RESPONSE TO PHQ ITEM 9 – STRATIFIED BY AGE

## One Minus Survival Function

phqagecat = 13 to 17

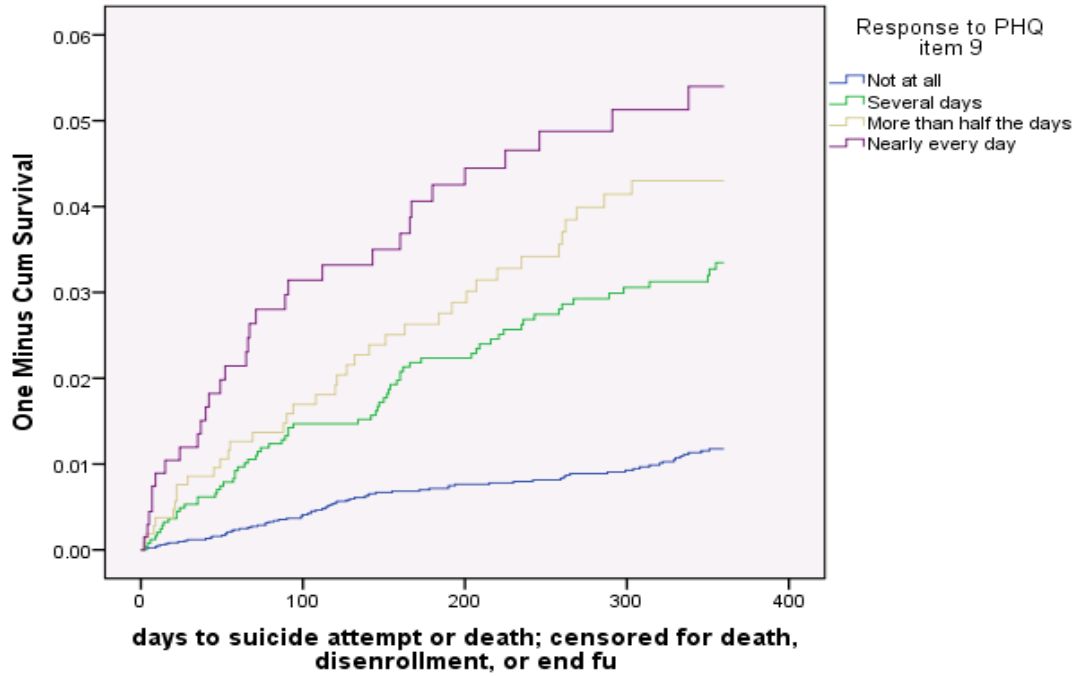

## One Minus Survival Function

phqagecat = 18 to 29

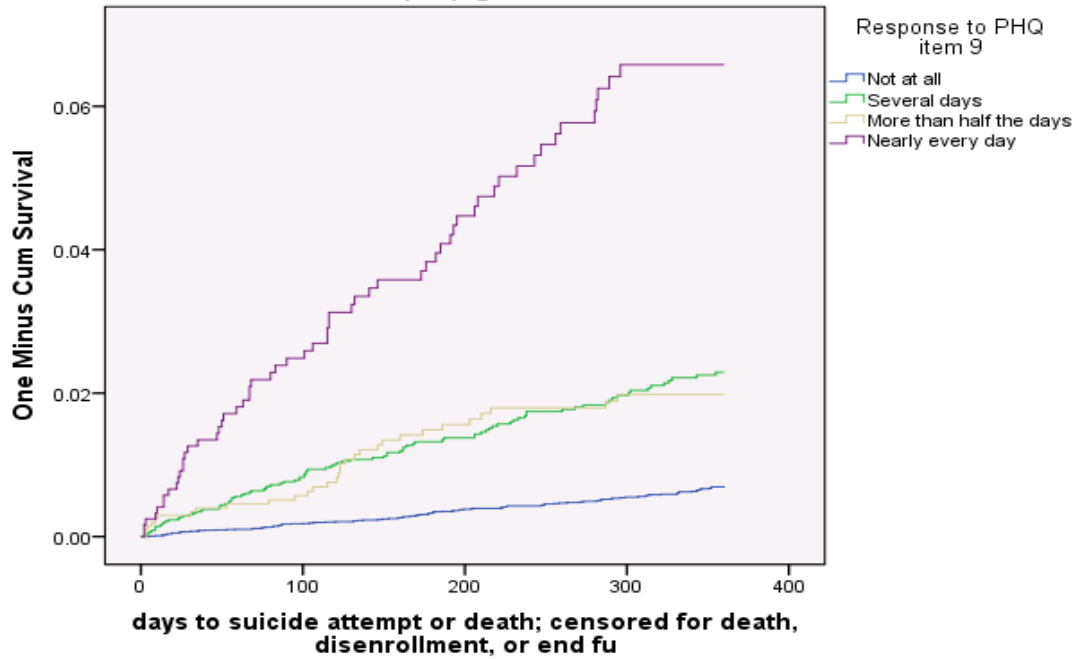

### One Minus Survival Function

phqagecat = 30 to 44

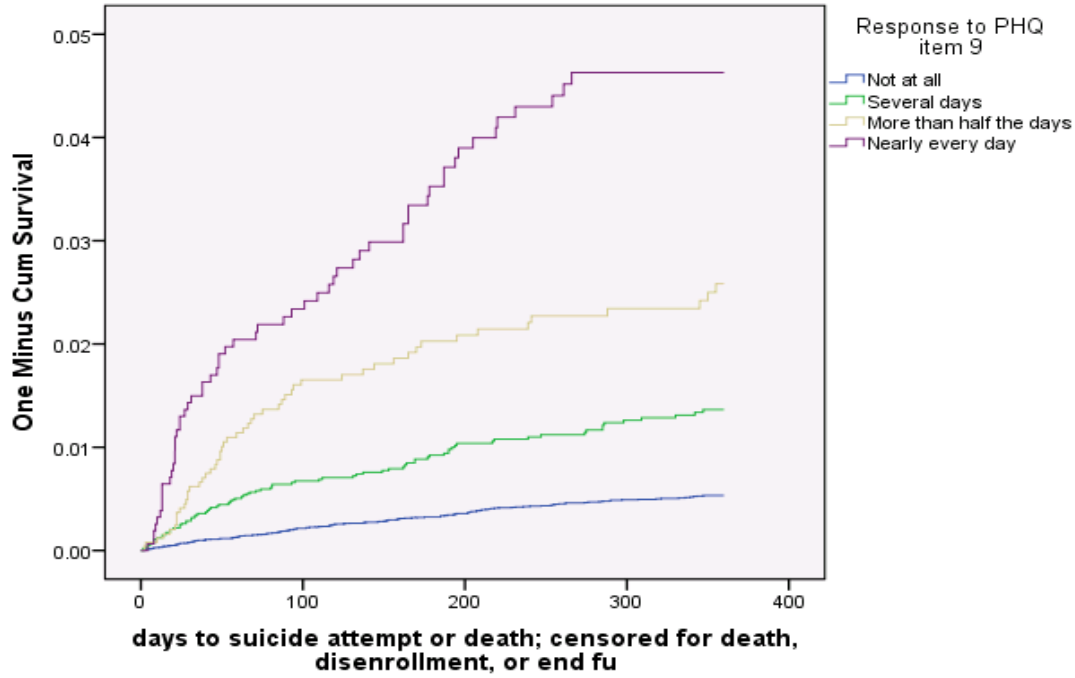

### One Minus Survival Function

phqagecat = 45 to 64

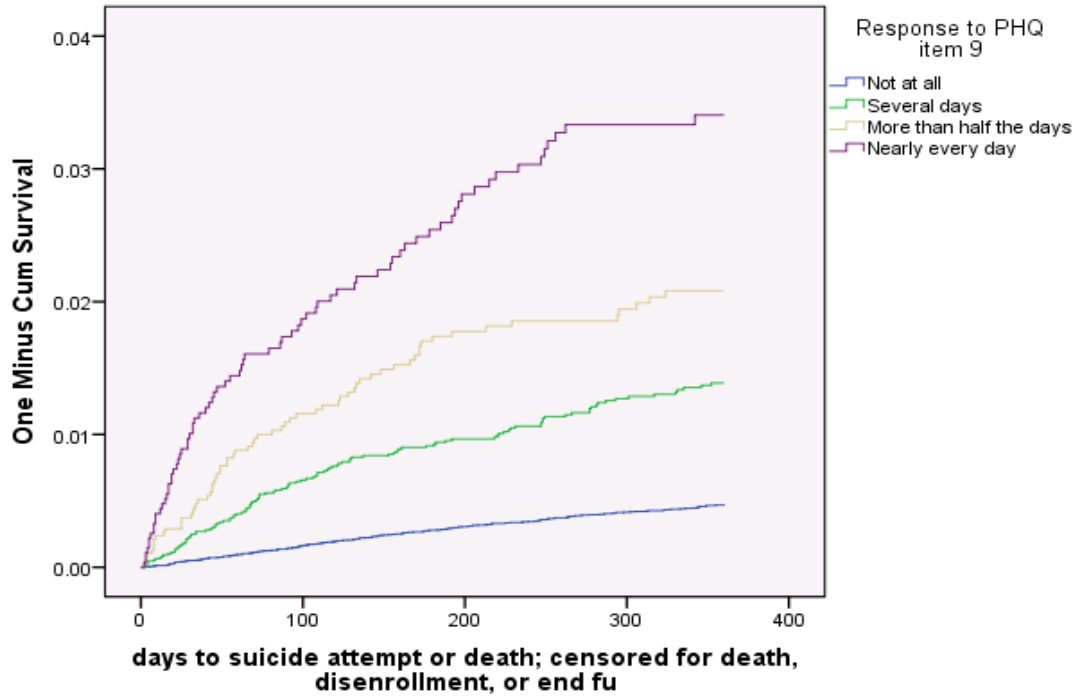

### One Minus Survival Function

phqagecat = 65 or older

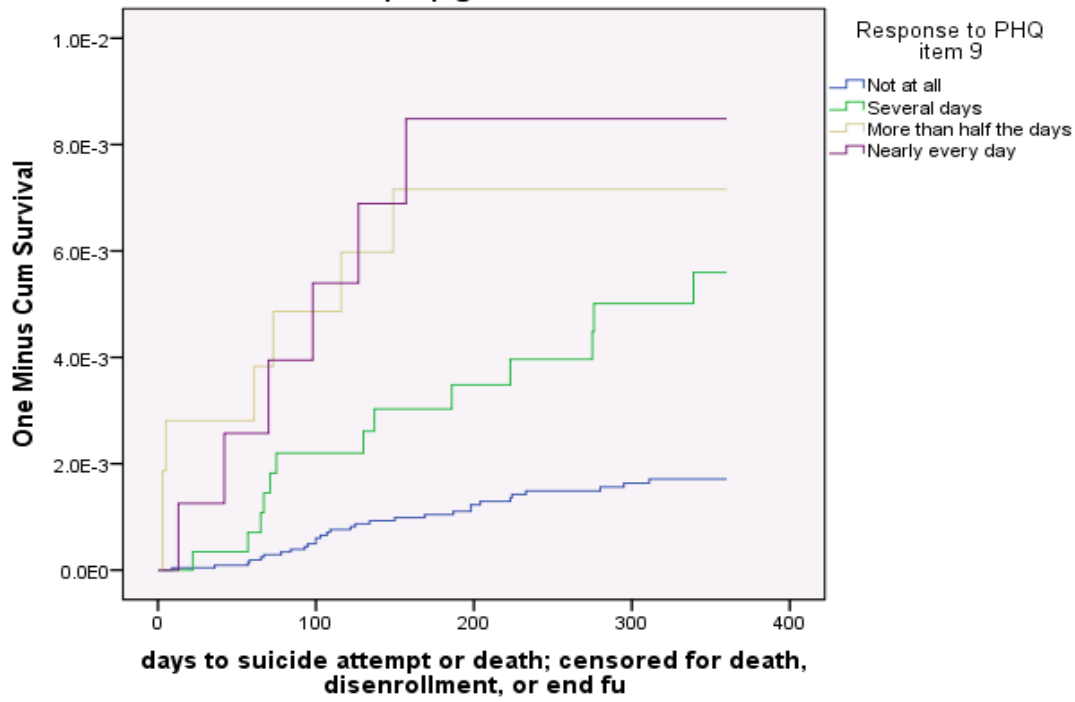

CUMULATIVE PROBABILITY OF SUICIDE ATTEMPT ACCORDING TO RESPONSE TO PHQ ITEM 9 – STRATIFIED BY TYPE OF VISIT AT WHICH PHQ WAS COMPLETED

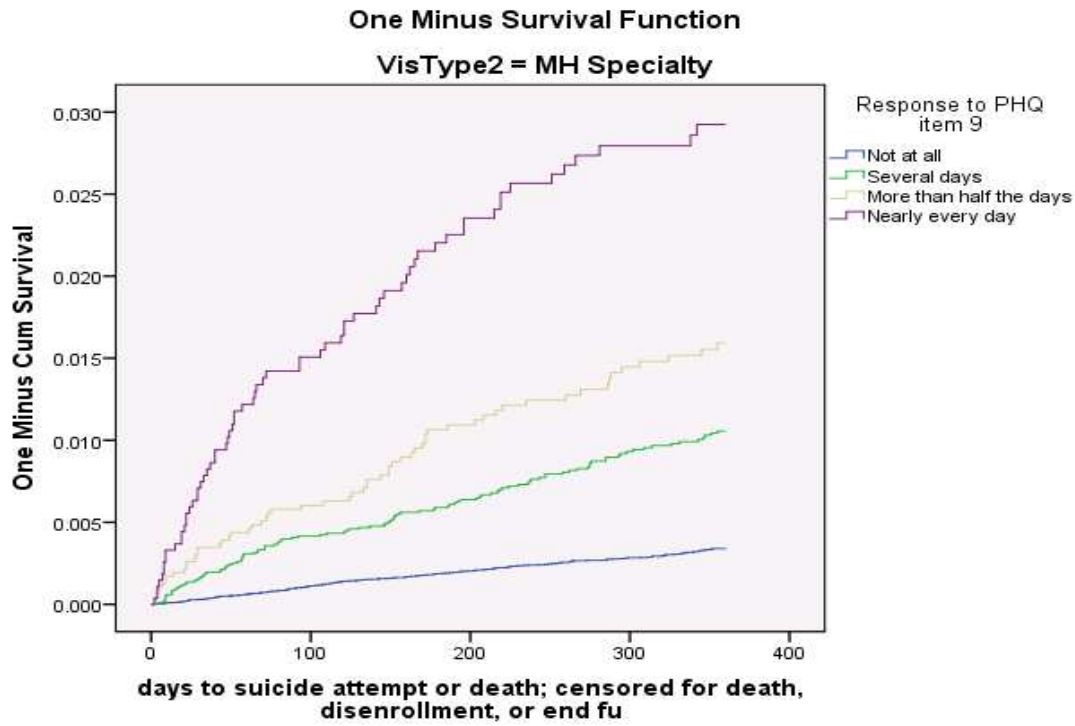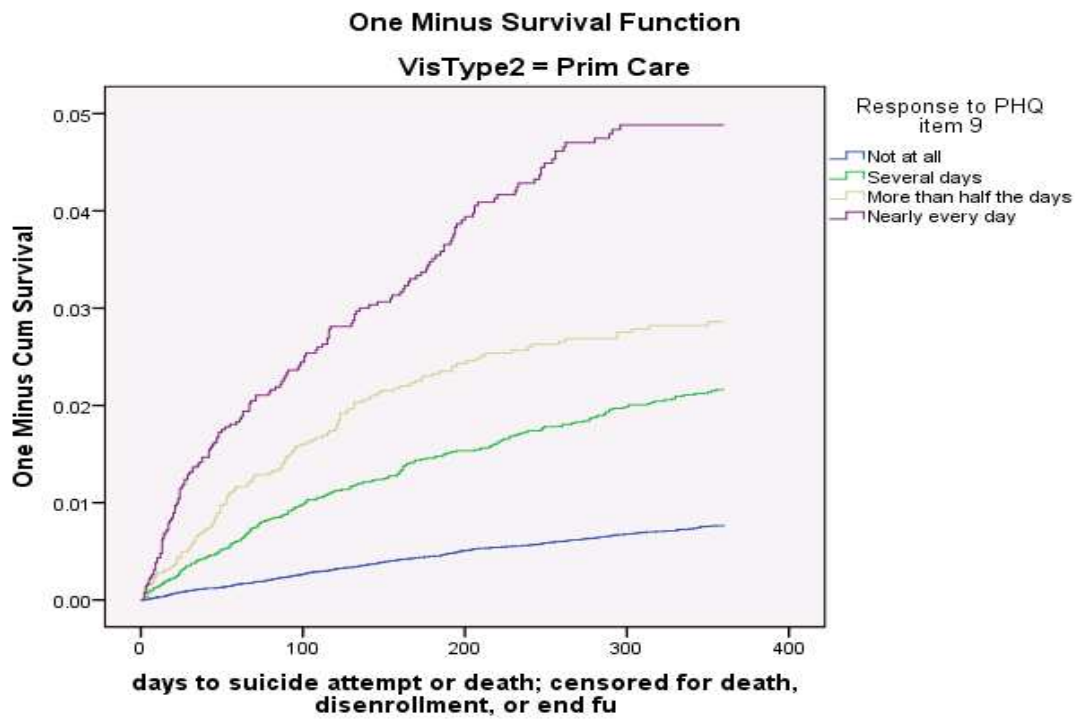

CUMULATIVE PROBABILITY OF SUICIDE ATTEMPT ACCORDING TO RESPONSE TO PHQ ITEM 9 – STRATIFIED BY CURRENT OR RECENT USE OF ANTIDEPRESSANT (YES/NO)

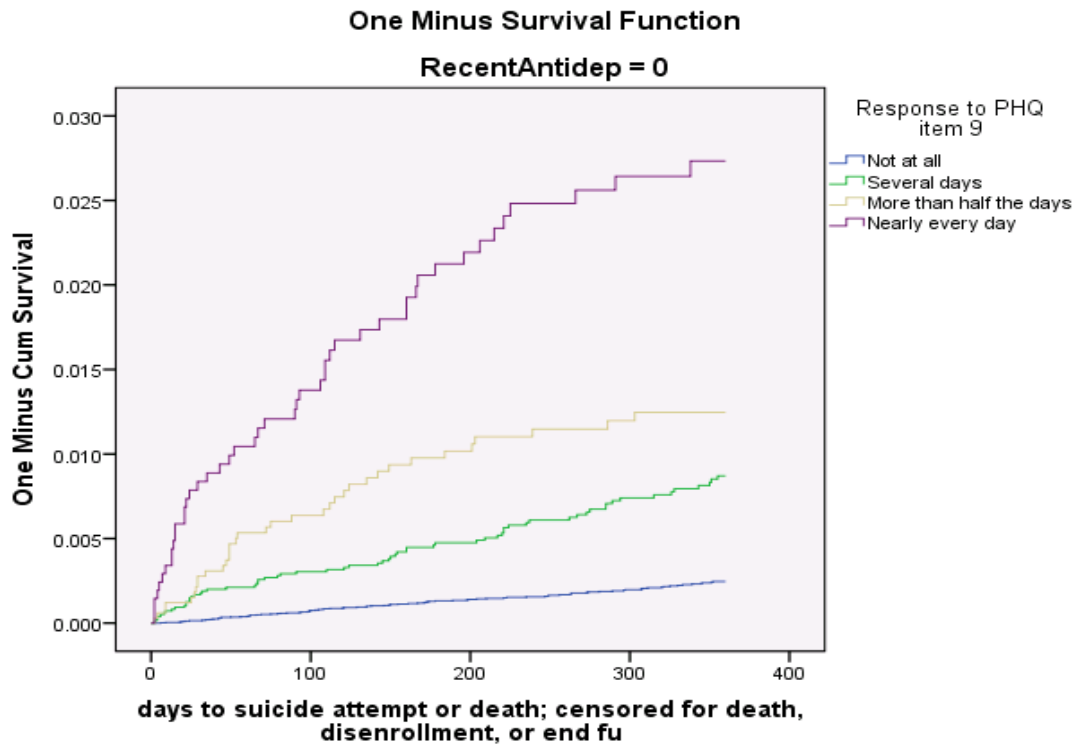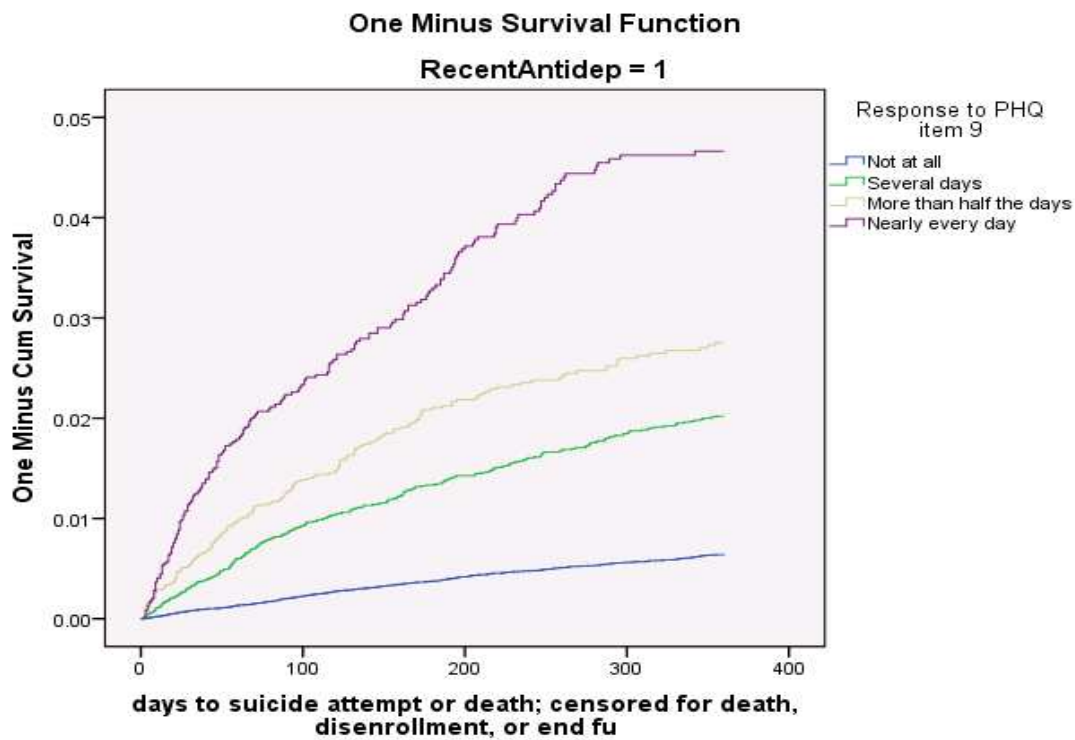

CUMULATIVE PROBABILITY OF SUICIDE ATTEMPT ACCORDING TO RESPONSE TO PHQ ITEM 9 – STRATIFIED BY YEAR IN WHICH PHQ WAS COMPLETED

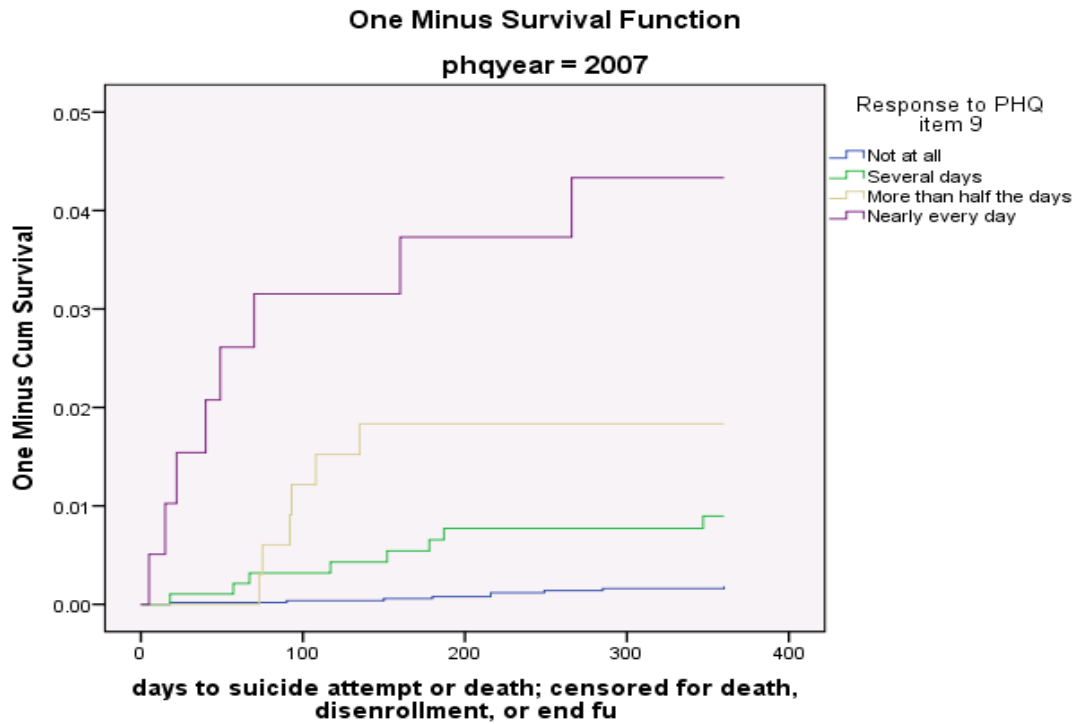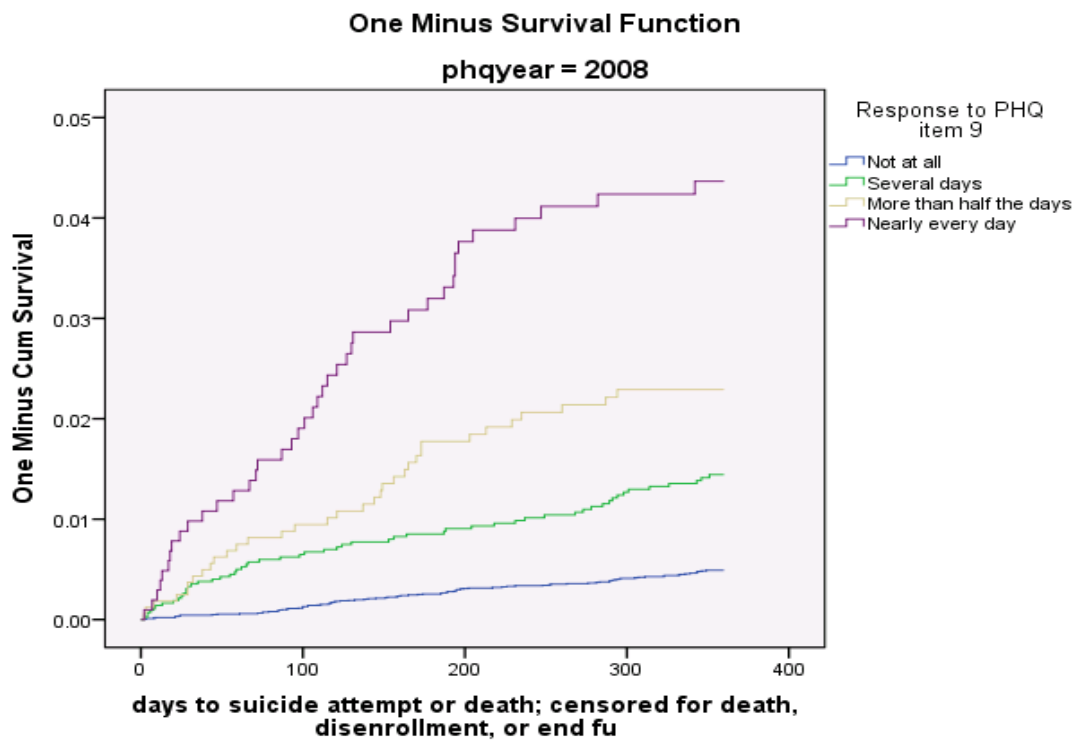



### One Minus Survival Function

phqyear = 2009

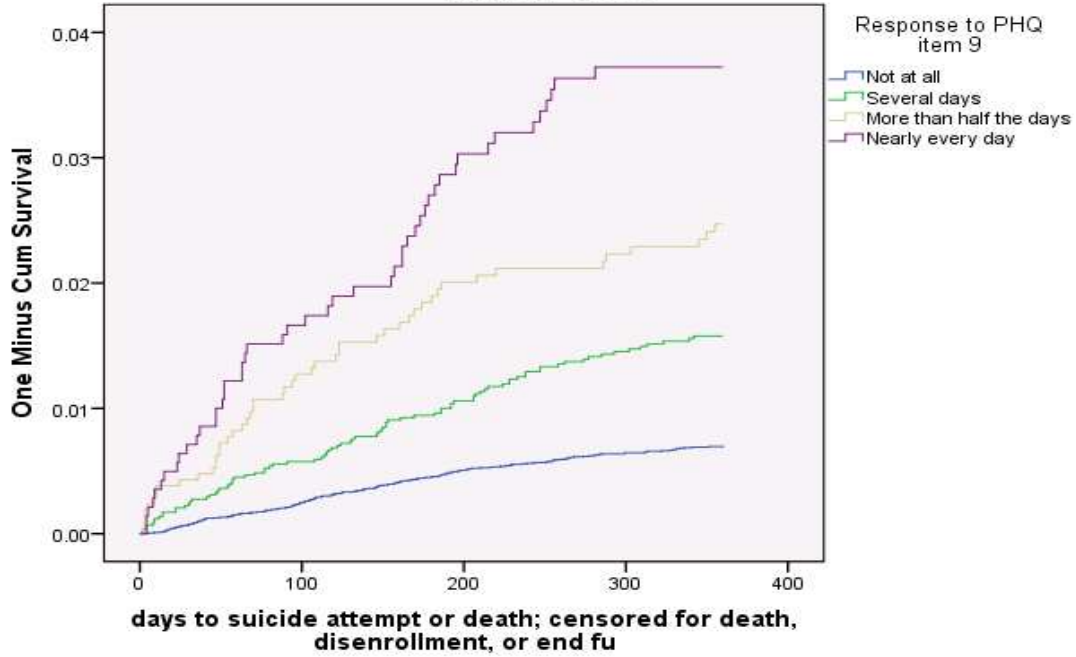

### One Minus Survival Function

phqyear = 2010

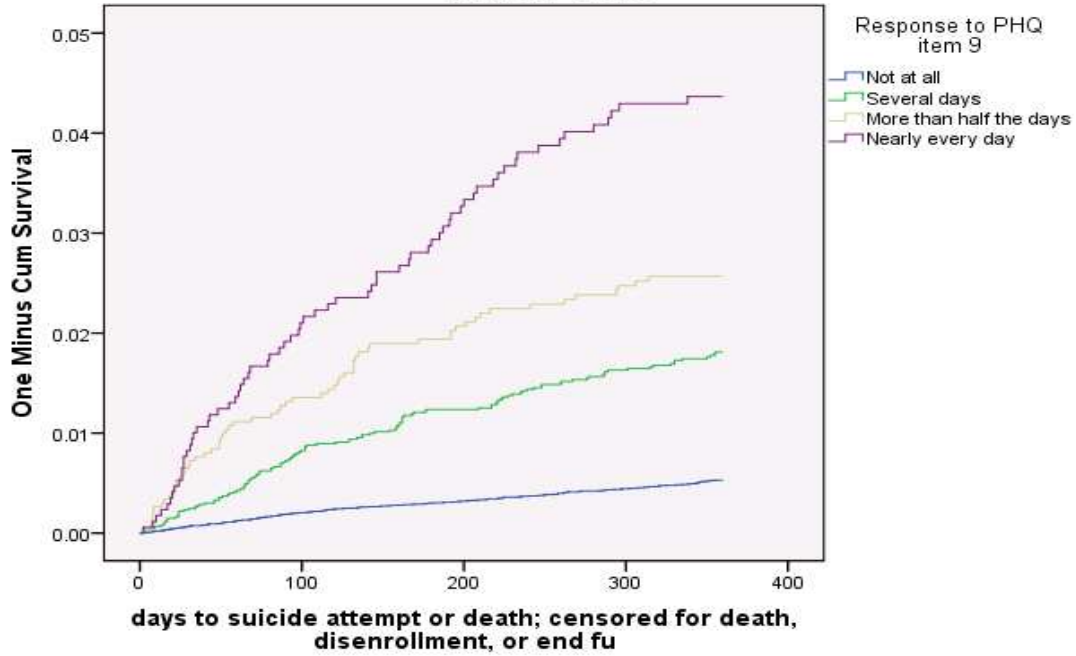

### One Minus Survival Function

phqyear = 2011

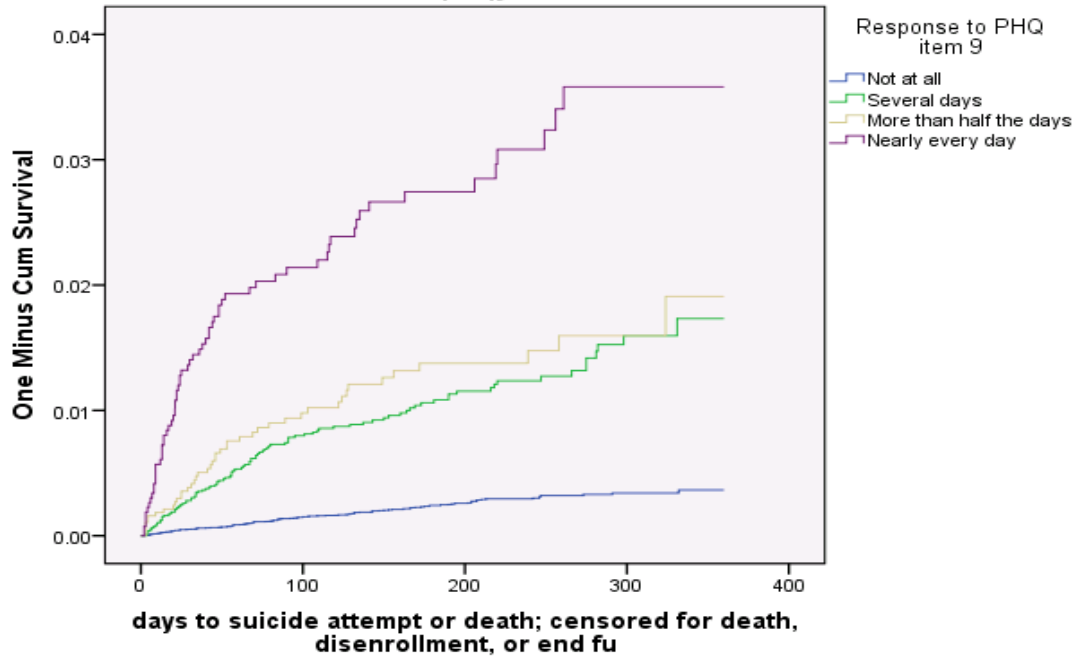

Supplement: 1195_ds001.pdf [file 1195_ds001.pdf]
